# Supplementary material
Source: PubMed Central journal article supplement (PMC6219386)
Supplement: NIHMS991315-supplement-1.pdf [file NIHMS991315-supplement-1.pdf]

**Current Biology, Volume 28**

**Supplemental Information**

**Conserved SUN-KASH Interfaces**

**Mediate LINC Complex-Dependent**

**Nuclear Movement and Positioning**

**Natalie E. Cain, Zeinab Jahed, Amy Schoenhofen, Venecia A. Valdez, Baila Elkin, Hongyan Hao, Nathan J. Harris, Leslie A. Herrera, Brian M. Woolums, Mohammad R.K. Mofrad, G.W. Gant Luxton, and Daniel A. Starr**

**Table S1. Oligonucleotides used in this study. Related to STAR Methods.**

| <b>oligonucleotides used for targeting Cas9 in <i>C. elegans</i></b> |                                  |                                                                                                                                                                                                                                                                                                        |                             |            |
|----------------------------------------------------------------------|----------------------------------|--------------------------------------------------------------------------------------------------------------------------------------------------------------------------------------------------------------------------------------------------------------------------------------------------------|-----------------------------|------------|
| Plasmid or RNA                                                       | Target                           | DNA or RNA target                                                                                                                                                                                                                                                                                      | Strain                      | Reference  |
| pSL715                                                               | <i>unc-83</i><br>5' of TM domain | ctatgataattgtgtccac                                                                                                                                                                                                                                                                                    | UD478<br>UNC-83+A           | [34]       |
| pSL771                                                               | <i>unc-84</i><br>SUN domain      | gttgtgtcaacaagatgct                                                                                                                                                                                                                                                                                    | UD497, 498<br>UNC-84(C953A) | This study |
| crRNA                                                                | <i>unc-83</i><br>KASH domain     | ccgcauguaaccuaugugaa                                                                                                                                                                                                                                                                                   | UD568<br>UNC-83(Y-7A)       | This study |
| crRNA                                                                | <i>anc-1</i> #1<br>KASH domain   | cauugcgacgacgaguacug                                                                                                                                                                                                                                                                                   | UD558<br>ANC-1(CC-AA)       | This study |
| crRNA                                                                | <i>anc-1</i> #2<br>KASH domain   | caguacucgucgucgcaaug                                                                                                                                                                                                                                                                                   | UD584<br>ANC-1(F-7A)        | This study |
| AP568-2 or<br>crRNA                                                  | <i>dpy-10</i>                    | gcuaccuaggcaccacgag                                                                                                                                                                                                                                                                                    | co-CRISPR                   | [54]       |
| <b>oligonucleotides used CRISPR/CAS9 repair templates</b>            |                                  |                                                                                                                                                                                                                                                                                                        |                             |            |
| Repair target                                                        |                                  | ssODN Sequence                                                                                                                                                                                                                                                                                         | Strain                      | Reference  |
| <i>unc-84</i> (yc35)<br>UNC-84(C953A)                                |                                  | gttgactatgccctggagagctcaggtggagctgtgtgtcgac<br>aagagcctcagagacgtacaaaagctacacaaggctggaa                                                                                                                                                                                                                | UD497, 498                  | This study |
| <i>unc-83</i> (yc50)<br>UNC-83(Y-7A)                                 |                                  | ctattatcacgtttcggaaaaccatttggcccgcgatgcaccgc<br>tgtcaatggaccaccaccggttaactgaatcatcagtattctga<br>ttgaaatccc                                                                                                                                                                                             | UD568                       | This study |
| <i>anc-1</i> (yc48)<br>ANC-1(CC-23-24AA)                             |                                  | gcactgctgttctacttatgggagccgctgtttggtccacactg<br>tgatgatgaatatgctgctcaacttctcaataattcgctaaaagtt<br>tgacccttcgctagaattc                                                                                                                                                                                  | UD558                       | This study |
| <i>anc-1</i> (yc56)<br>ANC-1(F-7A)                                   |                                  | gacgacaaaagatcccgttgagacgggtactcagaactgcttt<br>gccactcagggtttgtttatatttttaataataactaatgtctctc<br>atlttcaggcactgctgttctacttatgggagccgctgtttggttc<br>cacattgtgatgatgaatactgttgccaacttctcaataattcgct<br>aaaagtttgacccttcgctagaagccgtaaaccggcccgccac<br>cattttaatcttaatttttattttcattactattcactattgttccattc | UD584                       | This study |
| <i>dpy-10</i> (cn64)                                                 |                                  | cacttgaacttcaatacggcaagatgagaatgactggaacc<br>gtaccgcatgcggtgctatggtagcggagcttcatggttc<br>agaccaacagcctat                                                                                                                                                                                               | co-CRISPR                   | [52]       |

---

**siRNA sequences for tissue culture**

---

| siRNA target | siRNA Sequence        | Reference |
|--------------|-----------------------|-----------|
| noncoding    | uucuccgaacgugucacgutt | [23]      |
| Nesprin-2G   | ccaUCAUCCUGCACUUUCATT | [23]      |
| SUN2         | gggUCAUUCUGCAGCCAGATT | [23]      |

---

**primers for making mutations in siRNA rescue constructs**

---

| Rescue construct                      | Sequence                                                        | Reference  |
|---------------------------------------|-----------------------------------------------------------------|------------|
| EGFP-SUN2 <sup>C577S</sup>            | gaggagccagtggtatcagcaccgctcctctgagacttatg-<br>agaccaagacggcac   | This study |
| EGFP-SUN2 <sup>C577S</sup>            | gtgccgtcttggtctcataagtctcagaggagc-<br>gggtgctgataaacactggctcctc | This study |
| EGFP-mini-Nesprin-2G <sup>C-23S</sup> | gactacagcagcaccaggc                                             | This study |
| EGFP-mini-Nesprin-2G <sup>C-23S</sup> | gcctgggtgctgctgtagtc                                            | This study |
| EGFP-mini-Nesprin-2G <sup>Y-7A</sup>  | ccaccaacgggccacct                                               | This study |
| EGFP-mini-Nesprin-2G <sup>Y-7A</sup>  | cccgcagcatggggtaga                                              | This study |
